# Supplementary material for: Heat-Killed Lactococcus lactis subsp. cremoris H61 Altered the Iron Status of Young Women: A Randomized, Double-Blinded, Placebo-Controlled, Parallel-Group Comparative Study
Source: MDPI journal article supplement (doi:10.3390/nu14153144), 2022-07-30
Supplement: s1 [file s1]

## Supplementary Materials

**Table S1.** Changes in the iron status of women analyzed by generalized estimating equation.

|                |                         | Group   | Pre   |      |            | Post  |      |            | <i>p</i>      |  |
|----------------|-------------------------|---------|-------|------|------------|-------|------|------------|---------------|--|
|                |                         |         | EMM   | SE   | <i>p</i>   | EMM   | SE   | <i>p</i>   | (Pre vs Post) |  |
| Red blood cell | 10 <sup>4</sup> cell/mL | H61     | 464.2 | 2.4  | ] 0.455    | 454.4 | 8.1  | ] 0.661    | 0.239         |  |
|                |                         | Control | 459.2 | 6.1  |            | 460.6 | 6.7  |            | 0.840         |  |
| Hemoglobin     | g/dL                    | H61     | 13.7  | 0.1  | ] 0.327    | 13.3  | 0.3  | ] 0.736    | 0.133         |  |
|                |                         | Control | 13.5  | 0.2  |            | 13.4  | 0.2  |            | 0.751         |  |
| Hematcrit      | %                       | H61     | 42.5  | 0.2  | ] 0.404    | 41.1  | 0.7  | ] 0.658    | 0.057         |  |
|                |                         | Control | 42.0  | 0.5  |            | 41.7  | 0.6  |            | 0.561         |  |
| MCV            | fL                      | H61     | 91.7  | 0.3  | ] 0.982    | 90.5  | 0.5  | ] 0.927    | 0.023 *       |  |
|                |                         | Control | 91.7  | 0.5  |            | 90.6  | 0.5  |            | 0.012 *       |  |
| MCH            | fL                      | H61     | 29.6  | 0.1  | ] 0.499    | 29.3  | 0.1  | ] 0.894    | 0.024 **      |  |
|                |                         | Control | 29.5  | 0.1  |            | 29.3  | 0.1  |            | < 0.001       |  |
| MCHC           | %                       | H61     | 32.2  | 0.1  | ] 0.883    | 32.3  | 0.2  | ] 0.832    | 0.410         |  |
|                |                         | Control | 32.2  | 0.2  |            | 32.3  | 0.2  |            | 0.654         |  |
| Serum iron     | μg/dL                   | H61     | 103.8 | 4.4  | ] 0.025 *  | 140.8 | 17.1 | ] 0.022 *  | 0.035 *       |  |
|                |                         | Control | 75.2  | 11.8 |            | 72.8  | 13.7 |            | 0.835         |  |
| TIBC           | μg/dL                   | H61     | 358.9 | 4.5  | ] 0.424    | 346.7 | 9.0  | ] 0.528    | 0.140         |  |
|                |                         | Control | 368.6 | 8.7  |            | 357.5 | 9.0  |            | 0.089         |  |
| UIBC           | μg/dL                   | H61     | 256.8 | 4.0  | ] 0.001 ** | 221.3 | 10.8 | ] 0.003 ** | < 0.001 **    |  |
|                |                         | Control | 288.3 | 8.3  |            | 278.6 | 9.6  |            | 0.367         |  |
| TSAT           | %                       | H61     | 28.8  | 1.0  | ] 0.008 ** | 35.5  | 3.4  | ] 0.028 *  | 0.049 *       |  |
|                |                         | Control | 21.9  | 2.4  |            | 22.1  | 3.0  |            | 0.947         |  |
| Ferritin       | ng/mL                   | H61     | 31.1  | 0.9  | ] 0.209    | 35.9  | 1.3  | ] 0.018 *  | < 0.001 **    |  |
|                |                         | Control | 28.3  | 1.5  |            | 29.4  | 1.5  |            | 0.407         |  |
| Hepcidin       | ng/mL                   | H61     | 7.8   | 0.7  | ] 0.314    | 7.2   | 1.4  | ] 0.300    | 0.659 **      |  |
|                |                         | Control | 5.9   | 1.3  |            | 4.5   | 1.3  |            | 0.003         |  |

EMM, estimated marginal mean; SE, standard error; TIBC, total iron-binding capacity; UIBC, unsaturated iron binding capacity; TSAT, transferrin saturation; MCV, mean corpuscular volume; MCH, mean corpuscular hemoglobin; MCHC, mean corpuscular hemoglobin concentration. \*  $p < 0.05$ ; \*\*  $p < 0.01$ .

**Table S2.** Iron status and menstrual cycle analyzed by generalized estimating equation.

|                |                         | Follicular phase |     | Luteal phase |     | <i>p</i> |
|----------------|-------------------------|------------------|-----|--------------|-----|----------|
|                |                         | EMM              | SE  | EMM          | SE  |          |
| Red blood cell | 10 <sup>4</sup> cell/mL | 454.0            | 2.7 | 465.2        | 3.8 | 0.084    |
| Hemoglobin     | g/dL                    | 13.3             | 0.1 | 13.6         | 0.1 | 0.120    |
| Hematcrit      | %                       | 41.3             | 0.2 | 42.3         | 0.4 | 0.119    |
| MCV            | fL                      | 91.3             | 0.3 | 90.9         | 0.3 | 0.602    |
| MCH            | fL                      | 29.4             | 0.1 | 29.3         | 0.1 | 0.465    |
| MCHC           | %                       | 32.2             | 0.1 | 32.3         | 0.1 | 0.912    |
| Serum iron     | µg/dL                   | 99.2             | 7.6 | 102.4        | 8.6 | 0.843    |
| TIBC           | µg/dL                   | 348.6            | 4.7 | 367.2        | 7.3 | 0.119    |
| UIBC           | µg/dL                   | 253.3            | 4.3 | 269.2        | 4.7 | 0.074    |
| TSAT           | %                       | 27.4             | 0.0 | 26.8         | 0.0 | 0.807    |
| Ferritin       | ng/mL                   | 33.9             | 1.0 | 28.5         | 1.2 | 0.015    |
| Hepcidin       | ng/mL                   | 7.9              | 0.7 | 4.8          | 1.1 | 0.085    |

EMM, estimated marginal mean; SE, standard error; TIBC, total iron-binding capacity; UIBC, unsaturated iron-binding capacity; TSAT, transferrin saturation; MCV, mean corpuscular volume; MCH, mean corpuscular hemoglobin; MCHC, mean corpuscular hemoglobin concentration. \*  $p < 0.05$

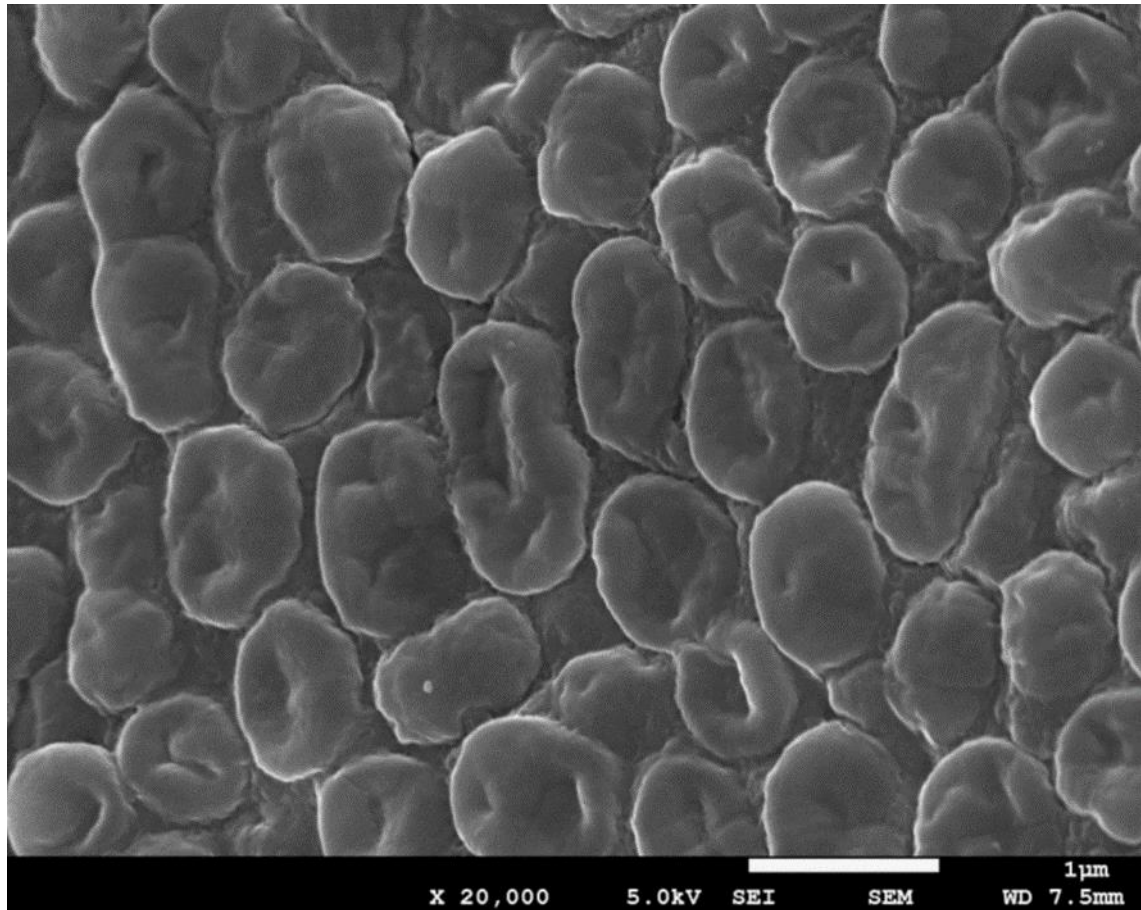

**Figure S1.** Microscopic view of the heat-killed *Lactococcus lactis* subsp. *cremoris* H61.
